# Supplementary material for: Exploring an efficient manganese oxide catalyst for ozone decomposition and its deactivation induced by water vapor
Source: Royal Society of Chemistry journal article supplement (doi:10.1039/d1nj01381e), 2021-01-01
Supplement: d1nj01381e1.pdf [file d1nj01381e1.pdf]

## Supporting Information

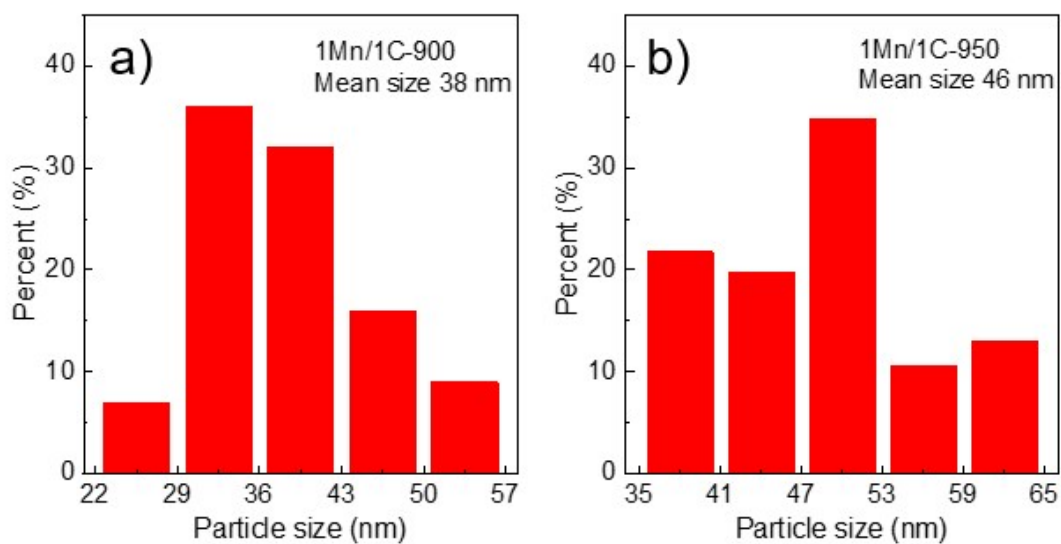

Fig. S1. The particle size distribution of MnO<sub>x</sub> in 1Mn/1C catalysts: a) 1Mn/1C-900 and b) 1Mn/1C-950.

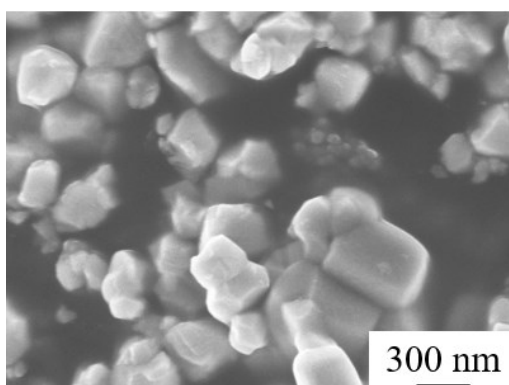

Fig. S2 SEM picture of MnO<sub>x</sub> catalyst prepared under 900 °C.

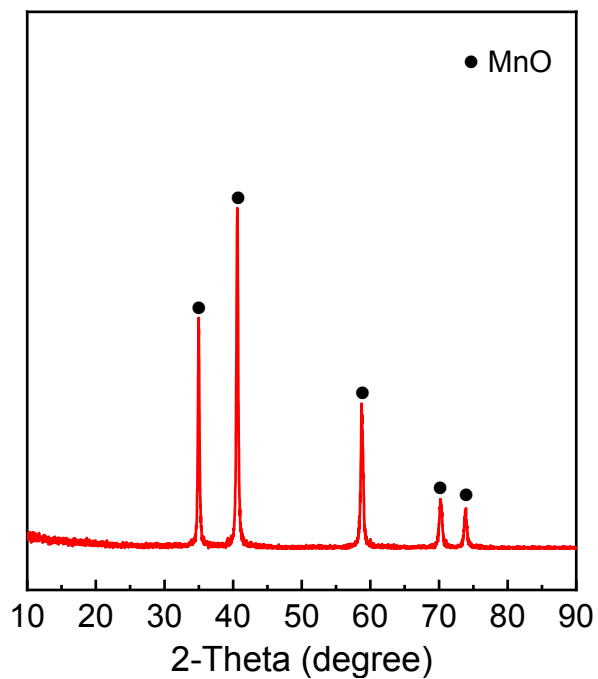

Fig. S3 XRD pattern of  $\text{MnO}_x$  catalyst prepared under 900 °C.

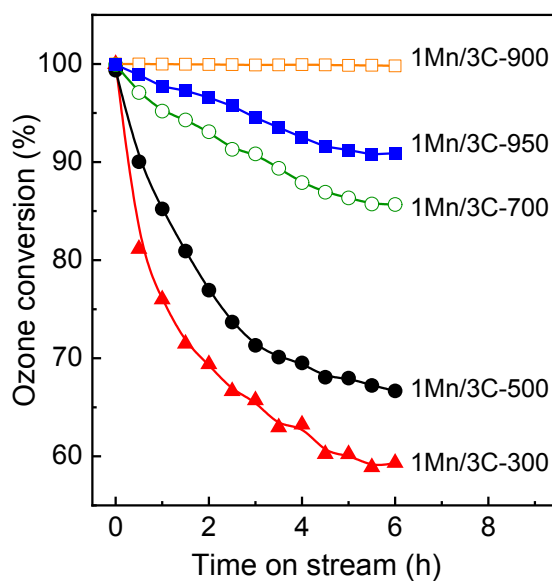

Fig. S4 The stability of 1Mn/3C catalyst for ozone decomposition (reaction condition: 0.1 g catalysts, ozone inlet concentration =  $25 \pm 1$  ppm,  $T = 25$  °C, RH = 90%, WHSV =  $600 \text{ L g}_{\text{cat}}^{-1} \text{ h}^{-1}$ ).

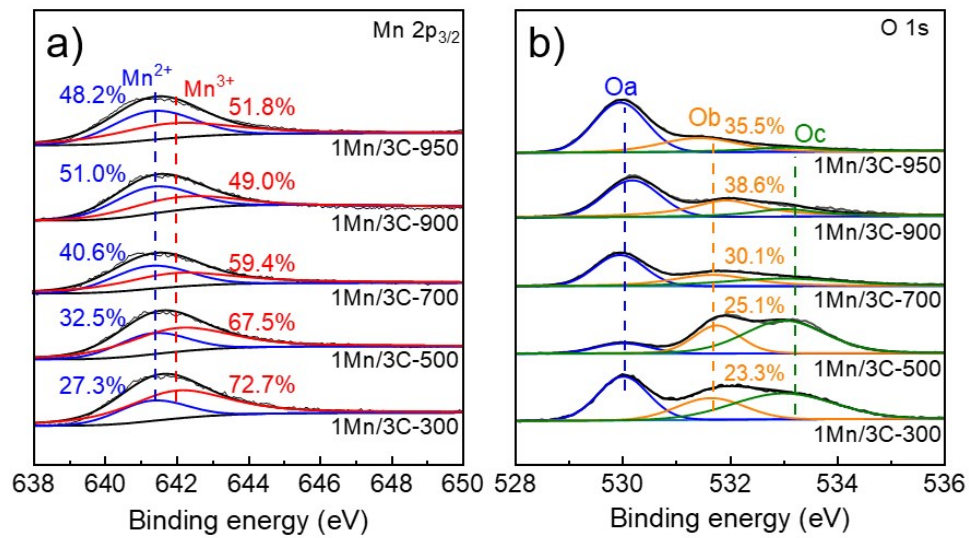

Fig. S5 XPS spectra of the 1Mn/3C-900 catalyst: a) Mn 2p<sub>3/2</sub>, b) O 1s.

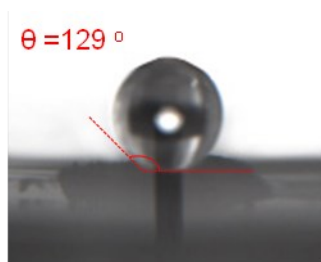

Fig. S6 Water contact angle test of 1Mn/3C-900 catalyst.

Table S1 The BET surface area and actual Mn content of Mn/C catalysts.

| Entry | Catalysts   | BET surface area<br>(m <sup>2</sup> /g) | Actual Mn<br>content (wt%) |
|-------|-------------|-----------------------------------------|----------------------------|
| 1     | C sphere    | 558                                     | 0                          |
| 2     | 1Mn/1C-300  | 35                                      | 40.5                       |
| 3     | 1Mn/1C-500  | 159                                     | 41.8                       |
| 4     | 1Mn/1C-700  | 200                                     | 39.7                       |
| 5     | 1Mn/1C-900  | 135                                     | 37.7                       |
| 6     | 1Mn/1C-950  | 189                                     | 38.9                       |
| 7     | 5Mn/1C-900  | 32                                      | 45.8                       |
| 8     | 3Mn/1C-900  | 136                                     | 41.5                       |
| 9     | 1Mn/3C-900  | 336                                     | 17.9                       |
| 10    | 1Mn/5C-900  | 343                                     | 13.8                       |
| 11    | 1Mn/10C-900 | 398                                     | 8.3                        |
